# Supplementary material for: Using drivers and transmission pathways to identify SARS-like coronavirus spillover risk hotspots
Source: PubMed Central journal article supplement (PMC10611769; doi:10.1038/s41467-023-42627-2), 2023-10-27
Supplement: 41467_2023_42627_MOESM3_ESM.pdf [file 41467_2023_42627_MOESM3_ESM.pdf]

## Description of Additional Supplementary Files

File Name: Supplementary Movie 1

Description: **Comparison among different scenarios of risk and access to health care.** The two data layers were divided in three quantiles and 9 unique legend colour codes.
